# Supplementary material for: Verticillium longisporum Elicits Media-Dependent Secretome Responses With Capacity to Distinguish Between Plant-Related Environments
Source: Front Microbiol. 2020 Aug 6;11:1876. doi: 10.3389/fmicb.2020.01876 (PMC7423881; doi:10.3389/fmicb.2020.01876)
Supplement: TABLE S8 — Primers used in this study. [file Table_8.xlsx]

## Sheet: Supplementary Table 8
Supplementary Table 8. Primers used in this study.
Primer name	Purpose	Sequence (5' to 3')	Size	Overhang
AO84	5'CP1	CAC GGA CGA GTC TCT CGG A	19 mer	-
AO85	5'CP1	ACC GGT CAC TGT ACA GTT GGA AGT TGA GGG GTG AT	35 mer	gpdA promoter
AO86	3'CP1	AGG TAA TCC TTC TTT GGC GTC TGC GTT ATT AGA G	34 mer	trpC terminator
AO87	3'CP1	CTC GGC AAA GGG TTT CTT	18 mer	-
AO131	5'CP1	ATT CTT AAT TAA GAT CAC GGA CGA GTC TCT CG	32 mer	pPK2 (EcoRV)
AO132	3'CP1	GGT ACC GAG CTC GAT CTC GGC AAA GGG TTT C	31 mer	pPK2 (EcoRV)
JST27	5'MEP1	GTA TGT TGT GTG GAA AAC AGG CTC TAT GGC GGG	33 mer	pME4564/primer ML1
JST28	5'MEP1	AAG ATC CCC GGG TAC CGG GAC GCG CAG GTT GTA AT	35 mer	gpdA promoter
JST29	3'MEP1	AGG TAA TCC TTC TTT ATA GTT CAT TCT GTT TGC ATC	36 mer	trpC terminator
JST30	3'MEP1	CAC AGT ACA CGA GGA TAG ACC CGA CGA CTT GTT	33 mer	pME4564/primer ML2
HygCAS-F	trpC promoter & hygromycin resistance gene	﻿AAT GAG CTC ACT AGT CCG CGA CGT TAA CTG ATA TTG	36 mer	-
HygCAS-R	trpC promoter & hygromycin resistance gene	AAT TCT AGA GGG CCC AGG CCT CCG GTC GGC ATC TAC TCT ATT	42 mer	-
ML1	backbone for ATMT of V. dahliae	TTC CAC ACA ACA TAC GAG CC	20 mer	-
ML2	backbone for ATMT of V. dahliae	TCC TCG TGT ACT GTG TAA GC	20 mer	-
ML8	gpdA promoter	AAA GAA GGA TTA CCT CTA AAC AA	23 mer	-
ML5	gpdA promoter & nourseothricin resistance gene	TGT ACA GTG ACC GGT GAC TCT T	22 mer	-
ML6	gpdA promoter & nourseothricin resistance gene	TCC CGC GGT CGG CAT CTA CTT CAG GGG CAG GGC ATG CT	38 mer	trpC terminator
ML7	nourseothricin resistance gene	TGA GCA TGC CCT GCC CCT GAA GTA GAT GCC GAC CGC G	37 mer	nourseothricin resistance gene
ML8	nourseothricin resistance gene	AAA GAA GGA TTA CCT CTA AAC AA	23 mer	-
ML9	nourseothricin resistance cassette (trpC terminator)	TGT ACA GTG ACC GGT GAC	18 mer	-
ML12	5'MEP2	GTA TGT TGT GTG GAA CCA CAC CGC TGG CTT ATC TT	35 mer	pME4564/primer ML1
ML13	5'MEP2	ACC GGT CAC TGT ACA GGT GAC GAT TGA GAA CCC GC	35 mer	gpdA promoter
ML14	3'MEP2	AGG TAA TCC TTC TTT ACG GAG AGT TGA AAC ACT CT	35 mer	trpC terminator
ML15	3'MEP2	CAC AGT ACA CGA GGA TTG TCA AGC AGA GCG CTA AC	35 mer	pME4564/primer ML2
ML16	5'CBD1	GTA TGT TGT GTG GAA GCC ACC TTG TTC AAC GTT GA	35 mer	pME4564/primer ML1
ML17	5'CBD1	ACC GGT CAC TGT ACA TTT GTG AGG ATT GTC GAC TGT C	37 mer	gpdA promoter
ML18	3'CBD1	AGG TAA TCC TTC TTT GCT ACC GCG GAC ACT ACC A	34 mer	trpC terminator
ML19	3'CBD1	CAC AGT ACA CGA GGA CAA CTC GAC AGT CTG CTG GG	35 mer	pME4564/primer ML2
ML20	5'GLA1	GTA TGT TGT GTG GAA GCT AGT CAA CAA TGC AAG AG	35 mer	pME4564/primer ML1
ML21	5'GLA1	ACC GGT CAC TGT ACA ATT GAA TTG ATA CCG AGC CG	35 mer	gpdA promoter
ML22	3'GLA1	AGG TAA TCC TTC TTT GTC GAC TCT CCT TCG TTG GT	35 mer	trpC terminator
ML23	3'GLA1	CAC AGT ACA CGA GGA CTT GGC ACC TTG CTC AGG AG	35 mer	pME4564/primer ML2
ML24	5'AMY1	GTA TGT TGT GTG GAA GCT TGC CTT GTT GAA CTT GA	35 mer	pME4564/primer ML1
ML25	5'AMY1	ACC GGT CAC TGT ACA GAT GAT GGT GAT GCC TCG TC	35 mer	gpdA promoter
ML26	3'AMY1	AGG TAA TCC TTC TTT TGA GCA GGA TTG TGC TTG C	34 mer	trpC terminator
ML27	3'AMY1	CAC AGT ACA CGA GGA GTA GTC GGC ATA TAG GAC AGC	36 mer	pME4564/primer ML2
ML86	5'NLP3	ATT CTT AAT TAA GAT AAT GGT GTA ACG TGA CGC G	34 mer	pME4564/pPK2 (EcoRV)
ML87	5'NLP3	ACC GGT CAC TGT ACA GGT GGA GAT TGC TGA TTG TT	35 mer	gpdA promoter
ML88	3'NLP3	AGG TAA TCC TTC TTT ATG GAC CCG AGG GGC GA	32 mer	trpC terminator
ML89	3'NLP3	AGG ACT TCT AGA AGG CTT CGA CCT CGC GTC GA	32 mer	pME4564 (StuI)
ML90	5'NLP2	ATT CTT AAT TAA GAT TAG AAT GAA GTT CTG GGG TCG	36 mer	pME4564 (EcoRV)
ML91	5'NLP2	AGA TCC CCG GGT ACC GGG ATC TTC CCT CCC ACC T	34 mer	gpdA promoter
ML92	3'NLP2	AGG TAA TCC TTC TTT TCT GGG TTG TGA GGA AGA GC	35 mer	trpC terminator
ML94	5'CP2	ATT CTT AAT TAA GAT ACT CCC AGT TTC TGC TAC TTC ATT	39 mer	pME4564 (EcoRV)
ML95	5'CP2	AGA TCC CCG GGT ACC GAC CAC GGC GCA TGT CTT	33 mer	gpdA promoter
ML96	3'CP2	AGG TAA TCC TTC TTT AAA TTG GGG GCG TTG CG	32 mer	trpC terminator
ML97	3'CP2	AGG ACT TCT AGA AGG TTG ACA ATT CAA CGC GAA CAC TAC	39 mer	pME4564 (StuI)
ML99	gpdA promoter for pME4990	GAT CTT GGA AAC CAT GGT GAT GTC TGC TCA AGC G	34 mer	NLP3
Ml100	NLP3	ATG GTT TCC AAG ATC TTC TCC AC	23 mer	-
ML101	NLP3	CTC GCC CTT GCT CAC ACC ACC GCT ACC ACC GAG CGC TGC CTT GGC	45 mer	GFP, linker
ML104	5'CP2	TGT TGT GTG GAA GAT ACT CCC AGT TTC TGC TAC TTC A	37 mer	pME4815 (EcoRV)
ML105	3'CP2	GGT CAC TGT ACA GAT TTG ACA ATT CAA CGC GAA C	34 mer	pME4815 (EcoRV)
ML106	3'NLP2	AGG ACT TCT AGA AGG ATT GGG TGA CGT TTT CAT GG	35 mer	pME4564 (StuI)
RH635	gpdA promoter	GGT ACC GAG CTC GAT GTG ACC GGT GAC TCT TTC TG	35 mer	pPK2 (EcoRV)
RH636	GFP	ATT CTT AAT TAA GAT CGA GTG GAG ATG TGG AGT G	34 mer	pPK2 (EcoRV)
RH686	GFP	GTG AGC AAG GGC GAG G	16 mer	-
RO3	hygromycin resistance (trpC terminator)	GGT ACC CGG GGA TCT TTC G	19 mer	-
SAB52	nourseothricin resistance cassette	GTA TGT TGT GTG GAA GAT ATC TGT ACA GTG ACC GGT GAC	39 mer	pME4564/primer ML1
SAB53	nourseothricin resistance cassette	CAC AGT ACA CGA GGA AAA GAA GGA TTA CCT CTA AAC AA	38 mer	pME4564/primer ML2
